# Supplementary material
Source: Frontiers journal article supplement (https://www.frontiersin.org/articles/361230)
Supplement: Data_Sheet_8.XLS [file Data_Sheet_8.XLS]

## Sheet: A. ipaensis
Data S7. Summary of 39 subtilisin-like protease (SDD1) genes in A. ipaensis.
Gene ID	Position	Start	End	Strand	Interproscan	KEGG
XP_007133571.1-D3	scaffold10964	119669	141427	-	Subtilase family	peptidase, putative (EC:3.4.21.25); K18443 golgi-specific brefeldin A-resistance guanine nucleotide exchange factor 1
XP_007141639.1-D2	scaffold11966	44207	49157	+	Peptidase inhibitor I9;Subtilase family;Subtilisin serine protease family (S8) signature	peptidase, putative (EC:3.4.21.25); K18443 golgi-specific brefeldin A-resistance guanine nucleotide exchange factor 1
XP_008381959.1	scaffold5711	49131	67240	+	PA domain;Peptidase inhibitor I9;Subtilase family;Subtilisin serine protease family (S8) signature	peptidase, putative (EC:3.4.21.25); K18443 golgi-specific brefeldin A-resistance guanine nucleotide exchange factor 1
XP_003523384.1	scaffold4681	182329	188516	-	PA domain;Peptidase inhibitor I9;Subtilase family;Subtilisin serine protease family (S8) signature	peptidase, putative (EC:3.4.21.25); K18443 golgi-specific brefeldin A-resistance guanine nucleotide exchange factor 1
XP_003533568.1-D3	scaffold3365	9295	14371	+	PA domain;Peptidase inhibitor I9;Subtilase family;Subtilisin serine protease family (S8) signature	peptidase, putative (EC:3.4.21.25); K18443 golgi-specific brefeldin A-resistance guanine nucleotide exchange factor 1
XP_004492929.1-D2	scaffold11966	22789	34738	+	PA domain;Peptidase inhibitor I9;Subtilase family;Subtilisin serine protease family (S8) signature	peptidase, putative (EC:3.4.21.25); K18443 golgi-specific brefeldin A-resistance guanine nucleotide exchange factor 1
XP_007155547.1	scaffold2873	96992	106051	+	PA domain;Peptidase inhibitor I9;Subtilase family;Subtilisin serine protease family (S8) signature	peptidase, putative (EC:3.4.21.25); K18443 golgi-specific brefeldin A-resistance guanine nucleotide exchange factor 1
XP_004492929.1-D8	scaffold11533	146246	154031	-	Peptidase inhibitor I9;Subtilase family;Subtilisin serine protease family (S8) signature	peptidase, putative (EC:3.4.21.25); K18443 golgi-specific brefeldin A-resistance guanine nucleotide exchange factor 1
XP_002524587.1-D3	scaffold7332	88018	91342	+	PA domain;Peptidase inhibitor I9;Subtilase family;Subtilisin serine protease family (S8) signature	peptidase, putative (EC:3.4.21.25); K18443 golgi-specific brefeldin A-resistance guanine nucleotide exchange factor 1
XP_003524182.2	scaffold1142	44596	48232	+	PA domain;Peptidase inhibitor I9;Subtilase family;Subtilisin serine protease family (S8) signature	peptidase, putative (EC:3.4.21.25); K18443 golgi-specific brefeldin A-resistance guanine nucleotide exchange factor 1
XP_007147961.1	scaffold10818	30958	38802	-	PA domain;Peptidase inhibitor I9;Subtilase family;Subtilisin serine protease family (S8) signature	peptidase, putative (EC:3.4.21.25); K18443 golgi-specific brefeldin A-resistance guanine nucleotide exchange factor 1
XP_004492929.1	scaffold4079	209490	236568	-	PA domain;Peptidase inhibitor I9;Subtilase family;Subtilisin serine protease family (S8) signature	peptidase, putative (EC:3.4.21.25); K18443 golgi-specific brefeldin A-resistance guanine nucleotide exchange factor 1
XP_008381959.1-D4	scaffold2541	329029	339026	-	PA domain;Peptidase inhibitor I9;Subtilase family;Subtilisin serine protease family (S8) signature	peptidase, putative (EC:3.4.21.25); K18443 golgi-specific brefeldin A-resistance guanine nucleotide exchange factor 1
XP_008381959.1-D17	scaffold1097	18373	20722	-	PA domain;Peptidase inhibitor I9;Subtilase family;Subtilisin serine protease family (S8) signature	peptidase, putative (EC:3.4.21.25); K18443 golgi-specific brefeldin A-resistance guanine nucleotide exchange factor 1
XP_004496644.1-D4	scaffold2852	45463	48196	+	PA domain;Peptidase inhibitor I9;Subtilase family;Subtilisin serine protease family (S8) signature	peptidase, putative (EC:3.4.21.25); K18443 golgi-specific brefeldin A-resistance guanine nucleotide exchange factor 1
XP_002524587.1	scaffold14165	57875	86936	-	PA domain;Peptidase inhibitor I9;Subtilase family;Subtilisin serine protease family (S8) signature	peptidase, putative (EC:3.4.21.25); K18443 golgi-specific brefeldin A-resistance guanine nucleotide exchange factor 1
XP_007137352.1	scaffold5799	154388	156727	-	PA domain;Peptidase inhibitor I9;Subtilase family;Subtilisin serine protease family (S8) signature	peptidase, putative (EC:3.4.21.25); K18443 golgi-specific brefeldin A-resistance guanine nucleotide exchange factor 1
NP_565309.2	scaffold2072	815547	819061	-	PA domain;Peptidase inhibitor I9;Subtilase family;Subtilisin serine protease family (S8) signature	peptidase, putative (EC:3.4.21.25); K18443 golgi-specific brefeldin A-resistance guanine nucleotide exchange factor 1
XP_007135429.1-D21	scaffold9858	88390	90669	+	PA domain;Peptidase inhibitor I9;Subtilase family;Subtilisin serine protease family (S8) signature	peptidase, putative (EC:3.4.21.25); K18443 golgi-specific brefeldin A-resistance guanine nucleotide exchange factor 1
XP_002516266.1-D19	scaffold4821	167093	170200	-	Subtilase family;Subtilisin serine protease family (S8) signature	peptidase, putative (EC:3.4.21.25); K18443 golgi-specific brefeldin A-resistance guanine nucleotide exchange factor 1
XP_003541562.1	scaffold10337	11185	18568	-	PA domain;Subtilase family	peptidase, putative (EC:3.4.21.25); K18443 golgi-specific brefeldin A-resistance guanine nucleotide exchange factor 1
NP_566483.1-D17	scaffold3199	8774	11053	-	PA domain;Peptidase inhibitor I9;Subtilase family;Subtilisin serine protease family (S8) signature	peptidase, putative (EC:3.4.21.25); K18443 golgi-specific brefeldin A-resistance guanine nucleotide exchange factor 1
XP_004496644.1-D22	scaffold7615	108881	111221	+	Peptidase inhibitor I9;Subtilase family;Subtilisin serine protease family (S8) signature	peptidase, putative (EC:3.4.21.25); K18443 golgi-specific brefeldin A-resistance guanine nucleotide exchange factor 1
XP_007155854.1-D22	scaffold15342	40442	42694	+	PA domain;Peptidase inhibitor I9;Subtilase family;Subtilisin serine protease family (S8) signature	peptidase, putative (EC:3.4.21.25); K18443 golgi-specific brefeldin A-resistance guanine nucleotide exchange factor 1
XP_008371534.1-D7	scaffold8026	235811	238117	-	PA domain;Peptidase inhibitor I9;Subtilase family;Subtilisin serine protease family (S8) signature	peptidase, putative (EC:3.4.21.25); K18443 golgi-specific brefeldin A-resistance guanine nucleotide exchange factor 1
NP_199378.1-D4	scaffold12180	39634	41991	-	PA domain;Peptidase inhibitor I9;Subtilase family;Subtilisin serine protease family (S8) signature	peptidase, putative (EC:3.4.21.25); K18443 golgi-specific brefeldin A-resistance guanine nucleotide exchange factor 1
XP_003516513.1-D2	scaffold1678	24517	29146	+	PA domain;Peptidase inhibitor I9;Subtilase family;Subtilisin serine protease family (S8) signature	peptidase, putative (EC:3.4.21.25); K18443 golgi-specific brefeldin A-resistance guanine nucleotide exchange factor 1
XP_002509669.1-D3	scaffold15342	45578	47949	-	PA domain;Peptidase inhibitor I9;Subtilase family;Subtilisin serine protease family (S8) signature	peptidase, putative (EC:3.4.21.25); K18443 golgi-specific brefeldin A-resistance guanine nucleotide exchange factor 1
XP_007135377.1-D2	scaffold1611	131110	133753	-	PA domain;Peptidase inhibitor I9;Subtilase family;Subtilisin serine protease family (S8) signature	peptidase, putative (EC:3.4.21.25); K18443 golgi-specific brefeldin A-resistance guanine nucleotide exchange factor 1
XP_007158047.1	scaffold9506	268401	272310	-	PA domain;Peptidase inhibitor I9;Subtilase family;Subtilisin serine protease family (S8) signature	peptidase, putative (EC:3.4.21.25); K18443 golgi-specific brefeldin A-resistance guanine nucleotide exchange factor 1
XP_008357123.1-D20	scaffold8138	422452	426070	-	Peptidase inhibitor I9;Subtilase family;Subtilisin serine protease family (S8) signature	peptidase, putative (EC:3.4.21.25); K18443 golgi-specific brefeldin A-resistance guanine nucleotide exchange factor 1
XP_008371534.1-D5	scaffold8440	140856	143238	+	PA domain;Peptidase inhibitor I9;Subtilase family;Subtilisin serine protease family (S8) signature	peptidase, putative (EC:3.4.21.25); K18443 golgi-specific brefeldin A-resistance guanine nucleotide exchange factor 1
XP_002522297.1-D5	scaffold7494	46724	48973	+	PA domain;Peptidase inhibitor I9;Subtilase family;Subtilisin serine protease family (S8) signature	peptidase, putative (EC:3.4.21.25); K18443 golgi-specific brefeldin A-resistance guanine nucleotide exchange factor 1
XP_004492929.1-D5	scaffold11533	84787	91351	+	Peptidase inhibitor I9;Subtilase family;Subtilisin serine protease family (S8) signature	peptidase, putative (EC:3.4.21.25); K18443 golgi-specific brefeldin A-resistance guanine nucleotide exchange factor 1
XP_003528733.1	scaffold15395	21585	23993	+	PA domain;Peptidase inhibitor I9;Subtilase family;Subtilisin serine protease family (S8) signature	peptidase, putative (EC:3.4.21.25); K18443 golgi-specific brefeldin A-resistance guanine nucleotide exchange factor 1
XP_002524360.1-D8	scaffold7788	92411	95040	-	PA domain;Peptidase inhibitor I9;Subtilase family;Subtilisin serine protease family (S8) signature	peptidase, putative (EC:3.4.21.25); K18443 golgi-specific brefeldin A-resistance guanine nucleotide exchange factor 1
XP_008383532.1-D18	scaffold27265	10614	13907	-	PA domain;Peptidase inhibitor I9;Subtilase family;Subtilisin serine protease family (S8) signature	peptidase, putative (EC:3.4.21.25); K18443 golgi-specific brefeldin A-resistance guanine nucleotide exchange factor 1
NP_566473.2-D61	scaffold27265	6189	7603	+	Subtilase family	peptidase, putative (EC:3.4.21.25); K18443 golgi-specific brefeldin A-resistance guanine nucleotide exchange factor 1
XP_007162604.1	scaffold2371	183366	194168	-	Exostosin family;PA domain;Peptidase inhibitor I9;Subtilase family;Subtilisin serine protease family (S8) signature	peptidase, putative (EC:3.4.21.25); K18443 golgi-specific brefeldin A-resistance guanine nucleotide exchange factor 1

## Sheet: A. duranensis
Data S7. Summary of 40 subtilisin-like protease (SDD1) genes in A. duranensis.
Gene ID	mRNA ID	Position	Start	End	Strand	Annotation
XP_015950747.1	XM_016095261.1	NC_029772.1	8690675	8695827	-	PREDICTED: subtilisin-like protease SBT3.5 isoform X1 [Arachis duranensis]
XP_015950753.1	XM_016095267.1	NC_029772.1	8690675	8695100	-	PREDICTED: subtilisin-like protease SBT1.6 isoform X2 [Arachis duranensis]
XP_015956566.1	XM_016101080.1	NC_029772.1	17189917	17192930	-	PREDICTED: subtilisin-like protease SBT1.7 [Arachis duranensis]
XP_015931571.1	XM_016076085.1	NC_029772.1	90022522	90025358	+	PREDICTED: subtilisin-like protease SBT1.8 [Arachis duranensis]
XP_015941500.1	XM_016086014.1	NC_029772.1	97803537	97807033	-	PREDICTED: LOW QUALITY PROTEIN: subtilisin-like protease SBT5.4 [Arachis duranensis]
XP_015947728.1	XM_016092242.1	NC_029773.1	1410819	1414220	+	PREDICTED: subtilisin-like protease SBT5.4 [Arachis duranensis]
XP_015947903.1	XM_016092417.1	NC_029773.1	2785892	2789846	+	PREDICTED: subtilisin-like protease SBT1.9 [Arachis duranensis]
XP_015948236.1	XM_016092750.1	NC_029773.1	6849172	6852237	-	PREDICTED: subtilisin-like protease SBT1.5 [Arachis duranensis]
XP_015950889.1	XM_016095403.1	NC_029773.1	87315683	87318110	+	PREDICTED: LOW QUALITY PROTEIN: subtilisin-like protease SBT1.1 [Arachis duranensis]
XP_015951820.1	XM_016096334.1	NC_029774.1	314994	318540	+	PREDICTED: subtilisin-like protease SBT5.3 [Arachis duranensis]
XP_015952465.1	XM_016096979.1	NC_029774.1	1523485	1526090	+	PREDICTED: subtilisin-like protease SBT1.6, partial [Arachis duranensis]
XP_015954750.1	XM_016099264.1	NC_029774.1	45309166	45312113	-	PREDICTED: LOW QUALITY PROTEIN: subtilisin-like protease SBT1.8 [Arachis duranensis]
XP_015958237.1	XM_016102751.1	NC_029774.1	132922001	132926059	-	PREDICTED: subtilisin-like protease SBT3.9 [Arachis duranensis]
XP_015958410.1	XM_016102924.1	NC_029775.1	823132	836821	-	PREDICTED: subtilisin-like protease SBT5.3 isoform X1 [Arachis duranensis]
XP_015958411.1	XM_016102925.1	NC_029775.1	823132	836820	-	PREDICTED: subtilisin-like protease SBT5.3 isoform X2 [Arachis duranensis]
XP_015961519.1	XM_016106033.1	NC_029775.1	104912596	104915574	+	PREDICTED: subtilisin-like protease SBT1.1 [Arachis duranensis]
XP_015961871.1	XM_016106385.1	NC_029775.1	109078678	109082479	-	PREDICTED: subtilisin-like protease SBT1.8 [Arachis duranensis]
XP_015962069.1	XM_016106583.1	NC_029775.1	111835941	111845022	+	PREDICTED: subtilisin-like protease Glyma18g48580 [Arachis duranensis]
XP_015962074.1	XM_016106588.1	NC_029775.1	111864122	111869800	-	PREDICTED: subtilisin-like protease Glyma18g48580 [Arachis duranensis]
XP_015962075.1	XM_016106589.1	NC_029775.1	111929034	111933520	+	PREDICTED: subtilisin-like protease Glyma18g48580 [Arachis duranensis]
XP_015962081.1	XM_016106595.1	NC_029775.1	112069445	112085553	+	PREDICTED: subtilisin-like protease Glyma18g48580 [Arachis duranensis]
XP_015962079.1	XM_016106593.1	NC_029775.1	112098035	112104395	+	PREDICTED: subtilisin-like protease Glyma18g48580 [Arachis duranensis]
XP_015962083.1	XM_016106597.1	NC_029775.1	112154307	112161878	-	PREDICTED: subtilisin-like protease Glyma18g48580 [Arachis duranensis]
XP_015962049.1	XM_016106563.1	NC_029775.1	112223869	112228854	-	PREDICTED: subtilisin-like protease Glyma18g48580 [Arachis duranensis]
XP_015962086.1	XM_016106600.1	NC_029775.1	112273776	112278531	+	PREDICTED: subtilisin-like protease Glyma18g48580 [Arachis duranensis]
XP_015963481.1	XM_016107995.1	NC_029776.1	3161024	3165361	-	PREDICTED: subtilisin-like protease SBT3.9 [Arachis duranensis]
XP_015964279.1	XM_016108793.1	NC_029776.1	12426776	12429218	+	PREDICTED: subtilisin-like protease SBT1.7 [Arachis duranensis]
XP_015964284.1	XM_016108798.1	NC_029776.1	12531520	12533799	-	PREDICTED: subtilisin-like protease SBT1.7 [Arachis duranensis]
XP_015965937.1	XM_016110451.1	NC_029776.1	80377785	80380396	+	PREDICTED: subtilisin-like protease SBT1.3 [Arachis duranensis]
XP_015968035.1	XM_016112549.1	NC_029777.1	750151	752548	+	PREDICTED: subtilisin-like protease SBT1.2 [Arachis duranensis]
XP_015968173.1	XM_016112687.1	NC_029777.1	1371684	1374581	+	PREDICTED: subtilisin-like protease SBT1.5 [Arachis duranensis]
XP_015972344.1	XM_016116858.1	NC_029777.1	107995817	107999354	-	PREDICTED: subtilisin-like protease SBT1.7 [Arachis duranensis]
XP_015972493.1	XM_016117007.1	NC_029777.1	108010956	108014261	-	PREDICTED: subtilisin-like protease SBT1.7 [Arachis duranensis]
XP_015933960.1	XM_016078474.1	NC_029779.1	2378136	2385588	+	PREDICTED: CO(2)-response secreted protease [Arachis duranensis]
XP_015935135.1	XM_016079649.1	NC_029779.1	16748729	16751443	-	PREDICTED: subtilisin-like protease SBT1.7 [Arachis duranensis]
XP_015937012.1	XM_016081526.1	NC_029779.1	40429585	40450159	-	PREDICTED: CO(2)-response secreted protease-like [Arachis duranensis]
XP_015939299.1	XM_016083813.1	NC_029780.1	14330178	14333262	-	PREDICTED: subtilisin-like protease SBT1.4 [Arachis duranensis]
XP_015941046.1	XM_016085560.1	NC_029780.1	101035037	101037617	+	PREDICTED: subtilisin-like protease SBT1.9 [Arachis duranensis]
XP_015941455.1	XM_016085969.1	NC_029780.1	108957619	108980165	+	PREDICTED: subtilisin-like protease SBT1.3 [Arachis duranensis]
XP_015942856.1	XM_016087370.1	NC_029781.1	783708	791302	-	PREDICTED: subtilisin-like protease SBT5.6 [Arachis duranensis]
